# Supplementary material for: Gambian cultural beliefs, attitudes and discourse on reproductive health and mortality: Implications for data collection in surveys from the interviewer’s perspective
Source: PLOS journal article supplement (doi:10.1371/journal.pone.0216924), 2019-05-16
Supplement: S1 (10.1371/journal.pone.0216924.s001) [file journal.pone.0216924.s001]

## C)PREGNANCY HISTORY QUESTIONNAIRE

### INTRODUCTION AND CONSENT

Hello. My name is \_\_\_\_\_. I am working with the Medical Research Council (MRC) The Gambia. We are conducting a survey of all women living in this area. The questions usually take about 20 minutes and will be mainly about your health. All of the answers you give will be confidential and will not be shared with anyone other than members of our survey team. You don't have to be in the survey, but we hope you will agree to answer the questions since your views are important. If I ask you any question you don't want to answer, just let me know and I will go on to the next question or you can stop the interview at any time.

In case you need more information about the survey, you may contact Anne Rerimoi (+2202133078).

Do you have any questions? May I begin the interview?

Signature of the Interviewer \_\_\_\_\_ Date \_\_\_\_\_

Respondent accepts

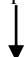

Respondent refuses

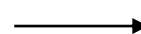

END

| NO. | QUESTIONS AND FILTERS                                                                                                                                                                                                                                                                                                                                                                                                                                                                                                                                                                    | CODING                                              | SKIP |
|-----|------------------------------------------------------------------------------------------------------------------------------------------------------------------------------------------------------------------------------------------------------------------------------------------------------------------------------------------------------------------------------------------------------------------------------------------------------------------------------------------------------------------------------------------------------------------------------------------|-----------------------------------------------------|------|
|     | I would like to ask you about all the pregnancies that you have had during your life. By this I mean all the children born to you whether they were born alive or dead, whether they are still living or not, whether they live with you or somewhere else, and all the pregnancies that you have had that did not result in a live birth. I understand that it is not easy to talk about children who have died, or pregnancies that ended before full term, but it is important that you tell us about all of them, so that we can help develop programs to improve children's health. |                                                     |      |
| 201 | First I would like to ask about all the births you have had during your life. Have you ever given birth?                                                                                                                                                                                                                                                                                                                                                                                                                                                                                 | YES ..... 1<br>NO ..... 2                           | 206  |
| 202 | Do you have any sons or daughters to whom you have given birth who are now living with you?                                                                                                                                                                                                                                                                                                                                                                                                                                                                                              | YES ..... 1<br>NO ..... 2                           | 204  |
| 203 | How many sons live with you?<br><br>And how many daughters live with you?<br><br>IF NONE, RECORD '00'.                                                                                                                                                                                                                                                                                                                                                                                                                                                                                   | SONS AT HOME.<br><br>DAUGHTERS AT<br><br>HOME ..... |      |
| 204 | Do you have any sons or daughters to whom you have given birth who are alive but do not live with you?                                                                                                                                                                                                                                                                                                                                                                                                                                                                                   | YES ..... 1<br>NO ..... 2                           | 206  |
| 205 | How many sons are alive but do not live with you?<br><br>And how many daughters are alive but do not live with you?<br><br>IF NONE, RECORD '00'.                                                                                                                                                                                                                                                                                                                                                                                                                                         | SONS<br>ELSEWHERE .<br>DAUGHTERS<br>ELSEWHERE       |      |
| 206 | Have you ever given birth to a boy or girl who was born alive but later died?                                                                                                                                                                                                                                                                                                                                                                                                                                                                                                            | YES ..... 1<br>NO ..... 2                           | 208  |
|     | IF NO, PROBE: Any baby who cried or showed signs of life but did not survive?                                                                                                                                                                                                                                                                                                                                                                                                                                                                                                            |                                                     |      |

# PREGNANCY HISTORY QUESTIONNAIRE

|     |                                                                                                                                                                                                                                |                                              |     |
|-----|--------------------------------------------------------------------------------------------------------------------------------------------------------------------------------------------------------------------------------|----------------------------------------------|-----|
| 207 | <p>How many boys have died?</p> <p>And how many girls have died?</p> <p>IF NONE, RECORD 'oo'.</p>                                                                                                                              | <p>BOYS DEAD ....</p> <p>GIRLS DEAD ....</p> |     |
| 208 | <p>Women sometimes have pregnancies that do not result in a live born child. That is, a pregnancy can end in a miscarriage, or the child can be born dead. Have you ever had a pregnancy that did not end in a live birth?</p> | <p>YES ..... 1</p> <p>NO ..... 2</p>         | 210 |
| 209 | <p>How many pregnancies have you had that did not end in a live birth?</p>                                                                                                                                                     | <p>PREGNANCY LOSSES .....</p>                |     |
| 210 | <p>SUM ANSWERS TO 203, 205, 207 AND 209, AND ENTER TOTAL. IF NONE, RECORD 'oo'.</p>                                                                                                                                            | <p>TOTAL PREGNANCIES .....</p>               |     |
| 211 | <p>CHECK 210:</p> <p>Just to make sure that I have this right: you have had in TOTAL _____ pregnancies during your life. Is that correct?</p> <p>YES NO PROBE AND CORRECT 201-210 AS NECESSARY.</p>                            |                                              |     |
| 212 | <p>CHECK 210:</p> <p>NO</p> <p>PREGNANCY ONE OR MORE PREGNANCIES</p>                                                                                                                                                           |                                              | 234 |

# PREGNANCY HISTORY QUESTIONNAIRE

|                                                                                                            |                                        |                                                                        |                                                                                                       |                                                                     |                          |                                    |                                                                                                        |                                                                                      |                                                                     |                                                                                                         |                                                                                                                   |
|------------------------------------------------------------------------------------------------------------|----------------------------------------|------------------------------------------------------------------------|-------------------------------------------------------------------------------------------------------|---------------------------------------------------------------------|--------------------------|------------------------------------|--------------------------------------------------------------------------------------------------------|--------------------------------------------------------------------------------------|---------------------------------------------------------------------|---------------------------------------------------------------------------------------------------------|-------------------------------------------------------------------------------------------------------------------|
| 212                                                                                                        | 213                                    | 214                                                                    | 215                                                                                                   | 216                                                                 | 217                      | 218                                | 219                                                                                                    | 220                                                                                  | 221                                                                 | 222                                                                                                     | 222A                                                                                                              |
| Did your (last/next to last/etc) pregnancy end in a live birth, stillbirth, miscarriage, or an abortion?   | Was this a single or a multiple birth? | In what month and year (was this child born / did this pregnancy end?) | CHECK 212:<br>RECORD<br>SAME<br>RESPONSE                                                              | What name was given to this child?<br>WRITE<br>'BABY 1'<br>BABY 2', | Is (NAME) a boy or girl? | Is (NAME) still alive?             | IF ALIVE:<br>How old was (NAME) on his/her last birthday?<br><br>RECORD<br>AGE IN<br>COMPLETE<br>YEARS | IF ALIVE:<br>Is (NAME) living with you?<br><br>RECORD<br>AGE IN<br>COMPLETE<br>YEARS | IF ALIVE:<br><b>RECORD<br/>HOUSEHOLD<br/>LINE No.<br/>OF CHILD.</b> | IF DIED:<br>How old was (NAME) when he/she died?<br><br>IF '1 YR',<br>PROBE:<br>How many months old was | Were there any other pregnancies between this and the pregnancy we were just talking about?<br><br>IF YES, ADD IT |
| o1<br>LIVE BIRTH . . . . 1<br>STILL BIRTH . . . . 2<br>MISCARRIAGE . . 3<br>ABORTION . . . . 4<br>GOTO 214 | SING 1<br>MULT 2                       | MONTH<br><br>YEAR                                                      | LIVE BIRTH . . . . 1<br>STILL BIRTH . . . . 2<br>MISCARRIAGE . . 3<br>ABORTION . . . . 4<br>GOTO 222A | NAME:                                                               | BOY 1<br>GIRL 2          | YES . . . 1<br>NO . . . . 2<br>222 | AGE IN<br>YEARS                                                                                        | YES . . 1<br>NO . . . 2                                                              | HH LINE NO.:<br><br>GOTO 222A                                       | DAYS . . 1<br>MONTHS 2<br>YEARS . . 3                                                                   | YES . . 1<br>ADD PREGNANCY<br><br>NO . . . 2<br>NEXT<br>PREGNANCY                                                 |
| o2<br>LIVE BIRTH . . . . 1<br>STILL BIRTH . . . . 2<br>MISCARRIAGE . . 3<br>ABORTION . . . . 4<br>GOTO 214 | SING 1<br>MULT 2                       | MONTH<br><br>YEAR                                                      | LIVE BIRTH . . . . 1<br>STILL BIRTH . . . . 2<br>MISCARRIAGE . . 3<br>ABORTION . . . . 4<br>GOTO 222A | NAME:                                                               | BOY 1<br>GIRL 2          | YES . . . 1<br>NO . . . . 2<br>222 | AGE IN<br>YEARS                                                                                        | YES . . 1<br>NO . . . 2                                                              | HH LINE NO.:<br><br>GOTO 222A                                       | DAYS . . 1<br>MONTHS 2<br>YEARS . . 3                                                                   | YES . . 1<br>ADD PREGNANCY<br><br>NO . . . 2<br>NEXT<br>PREGNANCY                                                 |

# PREGNANCY HISTORY QUESTIONNAIRE

|                                                                                                                 |                          |               |                                                                                                               |       |                 |                                |                 |                      |                           |                                      |                                                            |
|-----------------------------------------------------------------------------------------------------------------|--------------------------|---------------|---------------------------------------------------------------------------------------------------------------|-------|-----------------|--------------------------------|-----------------|----------------------|---------------------------|--------------------------------------|------------------------------------------------------------|
| 03<br>LIVE BIRTH .....<br>1<br>STILL BIRTH .....<br>2<br>MISCARRIAGE ..<br>3<br>ABORTION .....<br>4<br>GOTO 214 | SING 1<br>MULT 2<br>YEAR | MONTH<br>YEAR | LIVE BIRTH .<br>....1<br>STILL BIRTH .<br>... 2<br>MISCARRIAGE<br>.. 3<br>ABORTION .<br>....4<br>GOTO         | NAME: | BOY 1<br>GIRL 2 | YES .... 1<br>NO .... 2<br>222 | AGE IN<br>YEARS | YES .. 1<br>NO ... 2 | HH LINE NO.:<br>GOTO 222A | DAYS ... 1<br>MONTHS 2<br>YEARS .. 3 | YES .. 1<br>ADD PREGNANCY<br>NO ... 2<br>NEXT<br>PREGNANCY |
| 04<br>LIVE BIRTH .....<br>1<br>STILL BIRTH .....<br>2<br>MISCARRIAGE ..<br>3<br>ABORTION .... 4<br>GOTO 214     | SING 1<br>MULT 2<br>YEAR | MONTH<br>YEAR | LIVE BIRTH .<br>....1<br>STILL BIRTH .<br>... 2<br>MISCARRIAGE<br>.. 3<br>ABORTION .<br>... 4<br>GOTO 222A    | NAME: | BOY 1<br>GIRL 2 | YES .... 1<br>NO .... 2<br>222 | AGE IN<br>YEARS | YES .. 1<br>NO ... 2 | HH LINE NO.:<br>GOTO 222A | DAYS ... 1<br>MONTHS 2<br>YEARS .. 3 | YES .. 1<br>ADD PREGNANCY<br>NO ... 2<br>NEXT<br>PREGNANCY |
| 05<br>LIVE BIRTH .....<br>1<br>STILL BIRTH .....<br>2<br>MISCARRIAGE ..<br>3<br>ABORTION .....<br>4<br>GOTO 214 | SING 1<br>MULT 2<br>YEAR | MONTH<br>YEAR | LIVE BIRTH .<br>....1<br>STILL BIRTH .<br>... 2<br>MISCARRIAGE<br>.. 3<br>ABORTION .<br>....4<br>GOTO<br>222A | NAME: | BOY 1<br>GIRL 2 | YES .... 1<br>NO .... 2<br>222 | AGE IN<br>YEARS | YES .. 1<br>NO ... 2 | HH LINE NO.:<br>GOTO 222A | DAYS ... 1<br>MONTHS 2<br>YEARS .. 3 | YES .. 1<br>ADD PREGNANCY<br>NO ... 2<br>NEXT<br>PREGNANCY |

## PREGNANCY HISTORY QUESTIONNAIRE

| 212                                                                                                         | 213                                    | 214                                                                    | 215                                                                                                       | 216                                                                 | 217                      | 218                                | 219                                                                                                              | 220                                     | 221                                                                 | 222                                                                                                     | 222A                                                                                                              |
|-------------------------------------------------------------------------------------------------------------|----------------------------------------|------------------------------------------------------------------------|-----------------------------------------------------------------------------------------------------------|---------------------------------------------------------------------|--------------------------|------------------------------------|------------------------------------------------------------------------------------------------------------------|-----------------------------------------|---------------------------------------------------------------------|---------------------------------------------------------------------------------------------------------|-------------------------------------------------------------------------------------------------------------------|
| Did your (last/next to last/etc) pregnancy end in a live birth, stillbirth, miscarriage, or an abortion?    | Was this a single or a multiple birth? | In what month and year (was this child born / did this pregnancy end?) | CHECK<br>212:<br>RECORD<br>SAME<br>RESPONSE                                                               | What name was given to this child?<br>WRITE<br>'BABY 1'<br>BABY 2', | Is (NAME) a boy or girl? | Is (NAME) still alive?             | IF ALIVE:<br>How old was (NAME) on his/her last birthday?<br><br><b>RECORD<br/>AGE IN<br/>COMPLETE<br/>YEARS</b> | IF ALIVE:<br>Is (NAME) living with you? | IF ALIVE:<br><b>RECORD<br/>HOUSEHOLD<br/>LINE No.<br/>OF CHILD.</b> | IF DIED:<br>How old was (NAME) when he/she died?<br><br>IF '1 YR',<br>PROBE:<br>How many months old was | Were there any other pregnancies between this and the pregnancy we were just talking about?<br><br>IF YES, ADD IT |
| o6<br>LIVE BIRTH .....<br>1<br>STILL BIRTH .....<br>2<br>MISCARRIAGE ..<br>3<br>ABORTION .... 4<br>GOTO 214 | SING 1<br>MULT 2                       | MONTH<br><br>YEAR                                                      | LIVE BIRTH .<br>.... 1<br>STILL BIRTH .<br>... 2<br>MISCARRIAGE .. 3<br>ABORTION .<br>.... 4<br>GOTO 222A | NAME:                                                               | BOY 1<br>GIRL 2          | YES ... 1<br>NO .... 2<br><br>222  | AGE IN<br>YEARS                                                                                                  | YES .. 1<br>NO ... 2                    | HH LINE NO.:<br><br>GOTO 222A                                       | DAYS ... 1<br>MONTHS 2<br>YEARS .. 3                                                                    | YES ... 1<br>ADD PREGNANCY<br><br>NO ... 2<br>NEXT<br>PREGNANCY                                                   |
| o7<br>LIVE BIRTH .....<br>1<br>STILL BIRTH .....<br>2<br>MISCARRIAGE ..<br>3<br>ABORTION .... 4<br>GOTO 214 | SING 1<br>MULT 2                       | MONTH<br><br>YEAR                                                      | LIVE BIRTH .<br>.... 1<br>STILL BIRTH .<br>... 2<br>MISCARRIAGE .. 3<br>ABORTION .<br>... 4<br>GOTO 222A  | NAME:                                                               | BOY 1<br>GIRL 2          | YES .... 1<br>NO .... 2<br><br>222 | AGE IN<br>YEARS                                                                                                  | YES .. 1<br>NO ... 2                    | HH LINE NO.:<br><br>GOTO 222A                                       | DAYS ... 1<br>MONTHS 2<br>YEARS .. 3                                                                    | YES ... 1<br>ADD PREGNANCY<br><br>NO ... 2<br>NEXT<br>PREGNANCY                                                   |

|                            |        |       |                       |       |        |               |              |            |              |              |                |
|----------------------------|--------|-------|-----------------------|-------|--------|---------------|--------------|------------|--------------|--------------|----------------|
| 10<br>LIVE BIRTH . . . . . | SING 1 | MONTH | LIVE BIRTH . . . . 1  | NAME: | BOY 1  | YES . . . . 1 | AGE IN YEARS | YES . . 1  | HH LINE NO.: | DAYS . . . 1 | YES . . 1      |
| 1<br>STILL BIRTH . . . . . | MULT 2 | YEAR  | STILL BIRTH . . . . 2 |       | GIRL 2 | NO . . . . 2  |              | NO . . . 2 | GOTO 222A    | MONTHS 2     | ADD PREGNANCY  |
| 2<br>MISCARRIAGE . . . . . |        |       | MISCARRIAGE . . . . 3 |       |        | 222           |              |            |              | YEARS . . 3  | NO . . . 2     |
| 3<br>ABORTION . . . . .    |        |       | ABORTION . . . . . 4  |       |        |               |              |            |              |              | NEXT PREGNANCY |
| 4<br>GOTO 214              |        |       | GOTO 222A             |       |        |               |              |            |              |              |                |

# PREGNANCY HISTORY QUESTIONNAIRE

| NO. | QUESTIONS AND FILTERS                                                              | CODING CATEGORIES                                                                                                                                                                                                                 |  |
|-----|------------------------------------------------------------------------------------|-----------------------------------------------------------------------------------------------------------------------------------------------------------------------------------------------------------------------------------|--|
| 223 | <p>When did your last menstrual period start?</p> <p>(DATE, IF GIVEN)</p>          | <p>DAYS AGO ..... 1</p> <p>WEEKS AGO ..... 2</p> <p>MONTHS AGO ..... 3</p> <p>YEARS AGO ..... 4</p> <p>IN MENOPAUSE/<br/>HAS HAD HYSTERECTOMY → ... 994</p> <p>BEFORE LAST BIRTH ..... 995</p> <p>NEVER MENSTRUATED ..... 996</p> |  |
| 224 | Are you pregnant now?                                                              | <p>YES ..... 1</p> <p>NO ..... 2</p> <p>UNSURE ..... 8</p>                                                                                                                                                                        |  |
| 225 | <p>How many months pregnant are you?</p> <p>RECORD NUMBER OF COMPLETED MONTHS.</p> | MONTHS .....                                                                                                                                                                                                                      |  |
